# Supplementary material
Source: publisher site journal article supplement (https://www.dovepress.com/article/504884)
Supplement: Supplementary file 1 [file get_supplementary_file.php]

**Table S1** Changes of metabolites among sham and model group.

| No. | Name | Formula | Mode | M/Z | VIP | FC | P_value | Regulate |
| --- | --- | --- | --- | --- | --- | --- | --- | --- |
| 1 | DIMBOA-Glc | C15H19NO10 | pos | 338.0862 | 7.364 | 2.5206 | 3.70E-07 | up |
| 2 | Baptifoline | C15H20N2O2 | pos | 278.1857 | 5.7635 | 1.9018 | 2.44E-05 | up |
| 3 | Triisopropanolamine | C9H21NO3 | pos | 192.1592 | 5.1792 | 1.5819 | 0.001682 | up |
| 4 | 5,6-Dihydro-5-azacytidine | C8H14N4O5 | pos | 269.0874 | 4.967 | 0.4386 | 0.03457 | down |
| 5 | 1,2,5,6-Tetrahydro-4H-pyrrolo[3,2,1-ij]quinolin-4-one | C11H11NO | pos | 174.0911 | 4.7998 | 1.4362 | 4.94E-05 | up |
| 6 | Aminoglutethimide | C13H16N2O2 | pos | 233.128 | 4.6262 | 1.2831 | 3.81E-05 | up |
| 7 | Amotosalen | C17H19NO4 | pos | 319.1644 | 3.3658 | 1.2851 | 0.01371 | up |
| 8 | DG(2:0/PGJ2/0:0) | C25H38O7 | pos | 468.2919 | 2.7308 | 0.8681 | 0.02349 | down |
| 9 | 2-Quinolinecarboxylic acid | C10H7NO2 | pos | 174.0547 | 2.444 | 1.1001 | 0.000902 | up |
| 10 | (Z)-Methyl 3-(methylsulfinyl)-1-propenyl disulfide | C5H10OS3 | pos | 215.0226 | 2.3908 | 0.9159 | 0.000231 | down |
| 11 | 4-Acetamido-2-aminobutanoic acid | C6H12N2O3 | pos | 143.0813 | 2.3374 | 1.1136 | 0.03024 | up |
| 12 | N1-Acetylspermidine | C9H21N3O | pos | 188.1754 | 2.0533 | 0.9022 | 0.04435 | down |
| 13 | Salsoline-1-carboxylate | C12H15NO4 | pos | 202.0858 | 1.9147 | 1.0698 | 0.001798 | up |
| 14 | Trans-Cinnamic Acid | C9H8O2 | pos | 131.049 | 1.8917 | 1.0865 | 0.03308 | up |
| 15 | METHACHOLINE | C8H17NO2 | pos | 160.133 | 1.8633 | 1.0384 | 0.001702 | up |
| 16 | 5-Hydroxypentanoic acid | C5H10O3 | pos | 160.096 | 1.8619 | 1.056 | 0.006117 | up |
| 17 | LysoPE(0:0/18:3(9Z,12Z,15Z)) | C23H42NO7P | pos | 476.2764 | 1.8201 | 1.0529 | 0.003583 | up |
| 18 | Prenyl cis-caffeate | C14H16O4 | pos | 266.1382 | 1.7978 | 1.0524 | 0.002431 | up |
| 19 | Netilmicin | C21H41N5O7 | pos | 476.3057 | 1.7896 | 0.9432 | 0.02237 | down |
| 20 | Ser Ile Ala Asp | C16H28N4O8 | pos | 405.1971 | 1.7288 | 1.0528 | 0.04458 | up |
| 21 | Lithocholic acid glycine conjugate | C26H43NO4 | pos | 478.292 | 1.662 | 1.0271 | 0.000138 | up |
| 22 | Drostanolone | C20H32O2 | pos | 337.2729 | 1.6551 | 1.0303 | 8.01E-05 | up |
| 23 | Zalcitabine | C9H13N3O3 | pos | 212.1025 | 1.6482 | 0.9449 | 0.01629 | down |
| 24 | LysoPC(20:1(11Z)/0:0) | C28H56NO7P | pos | 550.3858 | 1.6389 | 1.0268 | 0.000933 | up |
| 25 | Soyasapogenol A | C30H50O4 | pos | 538.386 | 1.6186 | 1.035 | 0.007161 | up |
| 26 | PE(18:1(9Z)/0:0) | C23H46NO7P | pos | 480.3082 | 1.5503 | 1.0236 | 1.20E-05 | up |
| 27 | Ethyl 3-hydroxydodecanoate | C14H28O3 | pos | 262.2371 | 1.5167 | 1.0404 | 0.02289 | up |
| 28 | Aflatoxin G | C17H12O7 | pos | 367.0214 | 1.4057 | 1.0378 | 0.02421 | up |
| 29 | LysoPC(16:1(9Z)/0:0) | C24H48NO7P | pos | 516.3059 | 1.373 | 1.0252 | 0.03106 | up |
| 30 | 4-Heptyloxyphenol | C13H20O2 | pos | 209.1533 | 1.3252 | 0.969 | 0.02354 | down |
| 31 | O-Acetylserine | C5H9NO4 | pos | 112.0394 | 1.3017 | 1.0231 | 1.13E-06 | up |
| 32 | L-Dopa | C9H11NO4 | pos | 180.0653 | 1.2914 | 1.031 | 0.03722 | up |
| 33 | (3beta,5alpha,9alpha,22E,24R)-3,5,9-Trihydroxy-23-methylergosta-7,22-dien-6-one | C29H46O4 | pos | 522.3549 | 1.2575 | 1.0164 | 0.008201 | up |
| 34 | 1-eicosanoyl-glycero-3-phosphate | C23H47O7P | pos | 508.3392 | 1.2529 | 1.0196 | 0.01328 | up |
| 35 | Supinine | C15H25NO4 | pos | 266.1722 | 1.2388 | 0.9814 | 0.004378 | down |
| 36 | N-Methylphenylalanyl-prolyl-arginine | C21H32N6O4 | pos | 474.2848 | 1.2164 | 0.9798 | 0.04864 | down |
| 37 | Cetyl recinoleate | C34H66O3 | pos | 540.534 | 1.2059 | 0.978 | 0.0426 | down |
| 38 | Glycerylphosphorylcholine | C8H20NO6P | pos | 280.0914 | 1.2045 | 1.0182 | 0.04539 | up |
| 39 | Methenamine | C6H12N4 | pos | 141.1132 | 1.1754 | 0.9841 | 1.05E-05 | down |
| 40 | M-Xylene | C8H10 | pos | 107.0856 | 1.1718 | 0.9781 | 0.02166 | down |
| 41 | (5Z,8Z,10E,14Z,17Z)-12-Hydroxyicosa-5,8,10,14,17-pentaenoylcarnitine | C27H43NO5 | pos | 500.2753 | 1.1603 | 1.017 | 0.01728 | up |
| 42 | 1-O-Hexadecyl-sn-glycero-3-phosphocholine | C24H52NO6P | pos | 482.3597 | 1.1496 | 1.0152 | 0.008597 | up |
| 43 | 4-Pyridoxic Acid | C8H9NO4 | pos | 184.0602 | 1.1402 | 1.0245 | 0.02315 | up |
| 44 | Monopalmitin | C19H38O4 | pos | 313.273 | 1.138 | 1.02 | 0.01827 | up |
| 45 | L-Carnitine | C7H15NO3 | pos | 162.1122 | 1.1299 | 0.9857 | 0.02051 | down |
| 46 | P-Coumaryl Alcohol 4-O-Glucoside | C15H20O7 | pos | 295.117 | 1.1276 | 0.9799 | 0.04977 | down |
| 47 | Piperidines | C6H14NO4+ | pos | 329.1924 | 1.1101 | 0.9854 | 0.001036 | down |
| 48 | LysoPE(22:6(4Z,7Z,10Z,13Z,16Z,19Z)/0:0) | C27H44NO7P | pos | 526.2918 | 1.1075 | 1.0133 | 0.01559 | up |
| 49 | Thiomorpholine 3-carboxylate | C5H9NO2S | pos | 148.0423 | 1.0861 | 1.0205 | 0.04492 | up |
| 50 | LysoPC(18:1(11Z)/0:0) | C26H52NO7P | pos | 522.3546 | 1.0778 | 1.0125 | 0.02808 | up |
| 51 | Cyclohexane | C6H12 | pos | 102.1279 | 1.0654 | 0.9901 | 0.001517 | down |
| 52 | (R)-1-O-[b-D-Apiofuranosyl-(1->2)-b-D-glucopyranoside]-1,3-octanediol | C21H40O9 | pos | 419.2603 | 1.0589 | 0.9894 | 0.000111 | down |
| 53 | N6-Methyl-2'-deoxyadenosine | C11H15N5O3 | pos | 283.1507 | 1.0582 | 0.9887 | 5.06E-05 | down |
| 54 | Cinnamyl alcohol | C9H10O | pos | 135.0802 | 1.0529 | 0.9843 | 0.04268 | down |
| 55 | N-Acetyl-b-glucosaminylamine | C8H16N2O5 | pos | 253.1403 | 1.0483 | 0.9845 | 0.006265 | down |
| 56 | LysoPC(22:4(7Z,10Z,13Z,16Z)/0:0) | C30H54NO7P | pos | 572.3679 | 1.0472 | 1.0171 | 0.04091 | up |
| 57 | PE(20:4/0:0) | C25H44NO7P | pos | 502.2921 | 1.0418 | 1.0136 | 0.04549 | up |
| 58 | Dodecanoic acid | C12H24O2 | pos | 223.1688 | 1.0252 | 0.9853 | 0.02355 | down |
| 59 | Octanoate | C8H15O2- | pos | 287.2211 | 1.0133 | 0.9828 | 0.03901 | down |
| 60 | Floionolic acid | C18H36O5 | pos | 315.2524 | 1.0064 | 0.9843 | 0.03562 | down |
| 61 | 4-Chloro-L-phenylalanine | C9H10ClNO2 | pos | 241.0734 | 1.0003 | 0.9906 | 0.000711 | down |
| 62 | Inosine | C10H12N4O5 | neg | 267.0735 | 4.0186 | 0.698 | 0.0293 | down |
| 63 | P-Cresol glucuronide | C13H16O7 | neg | 283.0824 | 3.8972 | 0.8054 | 0.003284 | down |
| 64 | N-Palmitoyl Isoleucine | C22H43NO3 | neg | 368.317 | 3.15 | 1.2279 | 0.01163 | up |
| 65 | 3-[5-[(Dipropylamino)methyl]-1,2,4-oxadiazol-3-yl]-8-fluoro-5-methyl-4H-imidazo[1,5-a][1,4]benzodiazepin-6-one | C21H25FN6O2 | neg | 449.1503 | 3.101 | 1.2729 | 0.03375 | up |
| 66 | N-Stearoyl Histidine | C24H43N3O3 | neg | 466.3306 | 2.9694 | 1.127 | 0.002009 | up |
| 67 | 12,13-DHOME | C18H34O4 | neg | 295.2278 | 2.7383 | 1.0925 | 0.00173 | up |
| 68 | 4-Ethylphenylsulfate | C8H10O4S | neg | 201.0222 | 2.7211 | 1.0949 | 0.00755 | up |
| 69 | Phloretin | C15H14O5 | neg | 273.0769 | 2.6091 | 1.1929 | 0.04325 | up |
| 70 | Phenylglucuronide | C12H14O7 | neg | 269.0667 | 2.5138 | 0.9142 | 0.01008 | down |
| 71 | 3-amino-2-naphthoic acid | C11H9NO2 | neg | 186.0555 | 2.3868 | 1.1701 | 0.02804 | up |
| 72 | 4-Vinylphenol sulfate | C8H8O4S | neg | 245.0124 | 2.3732 | 1.0866 | 0.0136 | up |
| 73 | (2R)-2-Hydroxy-3-[(hydroxy{[(1S,2R,3R,4S,5S,6R)-2,3,4,5,6-pentahydroxycyclohexyl]oxy}phosphoryl)oxy]propyl (9Z,12Z)-octadeca-9,12-dienoate | C27H49O12P | neg | 595.2896 | 2.293 | 1.0607 | 0.000608 | up |
| 74 | 1-(11Z,14Z-eicosadienoyl)-glycero-3-phosphate | C23H43O7P | neg | 507.2731 | 2.1967 | 1.0529 | 0.000116 | up |
| 75 | 1-(11Z-eicosenoyl)-glycero-3-phosphate | C23H45O7P | neg | 509.2889 | 2.0272 | 1.0492 | 0.000354 | up |
| 76 | PE(18:3/0:0) | C23H42NO7P | neg | 474.2633 | 1.9942 | 1.054 | 0.001551 | up |
| 77 | 16-a-Hydroxypregnenolone | C21H32O3 | neg | 377.2335 | 1.9938 | 1.071 | 0.04702 | up |
| 78 | Hippuric Acid | C9H9NO3 | neg | 178.0503 | 1.9758 | 1.0616 | 0.03026 | up |
| 79 | LysoPE(18:2(9Z,12Z)/0:0) | C23H44NO7P | neg | 476.2784 | 1.9758 | 1.0351 | 0.000193 | up |
| 80 | LysoPA(18:2(9Z,12Z)/0:0) | C21H39O7P | neg | 433.2362 | 1.9724 | 1.048 | 0.002477 | up |
| 81 | LysoPE(P-18:0/0:0) | C23H48NO6P | neg | 464.3148 | 1.9704 | 1.0409 | 0.0003 | up |
| 82 | Vecuronium | C34H57N2O4+ | neg | 594.3783 | 1.9267 | 1.0465 | 0.004622 | up |
| 83 | 6alpha-hydroxy-castasterone | C28H50O5 | neg | 511.3643 | 1.9209 | 1.0668 | 0.03315 | up |
| 84 | 16-Hydroxyhexadecanoic acid | C16H32O3 | neg | 271.228 | 1.8388 | 1.0397 | 0.005107 | up |
| 85 | 2-Hydroxystearic acid | C18H36O3 | neg | 299.2592 | 1.8296 | 1.0459 | 0.01361 | up |
| 86 | N6-(Delta2-Isopentenyl)-adenine | C10H13N5 | neg | 202.108 | 1.8227 | 1.0623 | 0.03478 | up |
| 87 | Deoxyuridine | C9H12N2O5 | neg | 227.067 | 1.7573 | 1.0458 | 0.001647 | up |
| 88 | Docosahexaenoic Acid | C22H32O2 | neg | 327.233 | 1.7095 | 1.0359 | 0.008452 | up |
| 89 | D-Sorbitol | C6H14O6 | neg | 181.0712 | 1.7019 | 1.0415 | 0.005009 | up |
| 90 | LysoPE(P-18:1(9Z)/0:0) | C23H46NO6P | neg | 462.2994 | 1.6884 | 1.0334 | 0.00112 | up |
| 91 | L-Palmitoylcarnitine | C23H45NO4 | neg | 436.2835 | 1.6374 | 1.028 | 0.000594 | up |
| 92 | 12-Hydroxyheptadecanoylcarnitine | C24H47NO5 | neg | 466.294 | 1.6097 | 1.0316 | 0.000506 | up |
| 93 | Linalool oxide (cis-pyran) | C11H20O2 | neg | 229.1443 | 1.5877 | 1.0524 | 0.008158 | up |
| 94 | PE(16:0/0:0) | C21H44NO7P | neg | 452.2785 | 1.5836 | 1.0218 | 9.43E-05 | up |
| 95 | PE(22:6/0:0) | C27H44NO7P | neg | 524.2785 | 1.4983 | 1.0204 | 0.003713 | up |
| 96 | PE(20:5/0:0) | C25H42NO7P | neg | 498.2631 | 1.4905 | 1.0253 | 0.006755 | up |
| 97 | 20-Hydroxyeicosatrieneoic acid | C20H34O3 | neg | 321.243 | 1.4771 | 1.0288 | 0.02555 | up |
| 98 | Glycocholic acid | C26H43NO6 | neg | 500.2786 | 1.4759 | 1.0215 | 0.009638 | up |
| 99 | Benzoin | C14H12O2 | neg | 249.0321 | 1.4628 | 0.9698 | 0.003477 | down |
| 100 | Edetic Acid | C10H16N2O8 | neg | 273.0728 | 1.4608 | 1.0422 | 0.03203 | up |
| 101 | 1-(9Z-Nonadecenoyl)-glycero-3-phosphoethanolamine | C24H48NO7P | neg | 538.3155 | 1.4463 | 1.023 | 0.001889 | up |
| 102 | Daucol | C15H26O2 | neg | 283.1915 | 1.4069 | 1.0352 | 0.0242 | up |
| 103 | 9(S)-HpODE | C18H32O4 | neg | 311.2229 | 1.3915 | 1.0312 | 0.03018 | up |
| 104 | 8,11-eicosadiynoic acid | C20H32O2 | neg | 303.233 | 1.3724 | 1.0244 | 0.009248 | up |
| 105 | 1-Heneicosanoyl-glycero-3-phosphoserine | C27H54NO9P | neg | 566.3471 | 1.3475 | 1.0201 | 0.004991 | up |
| 106 | Benzodiazepine | C9H8N2 | neg | 181.0168 | 1.3316 | 0.9725 | 0.006722 | down |
| 107 | PE(P-18:0/22:6(4Z,7Z,10Z,13Z,16Z,19Z)) | C45H78NO7P | neg | 774.5454 | 1.2568 | 1.0189 | 0.004802 | up |
| 108 | Pseudouridine | C9H12N2O6 | neg | 243.0621 | 1.223 | 0.9771 | 0.0156 | down |
| 109 | PE-NMe(18:1(11Z)/18:2(9Z,12Z)) | C42H78NO8P | neg | 800.5461 | 1.1661 | 1.0206 | 0.03515 | up |
| 110 | Kojic Acid | C6H6O4 | neg | 123.0079 | 1.1123 | 0.976 | 0.01874 | down |
| 111 | LysoPC(18:3(9Z,12Z,15Z)/0:0) | C26H48NO7P | neg | 562.3155 | 1.0919 | 1.0173 | 0.01047 | up |
| 112 | Cortolone | C21H34O5 | neg | 387.2155 | 1.0755 | 0.9813 | 0.04714 | down |
| 113 | LysoPC(15:0/0:0) | C23H48NO7P | neg | 480.3097 | 1.0662 | 1.0118 | 0.003848 | up |

**Table S2** Changes of metabolites among model and allicin group.

| No. | Metabolite | Formula | Mode | M/Z | VIP | FC | P_value | Regulate |
| --- | --- | --- | --- | --- | --- | --- | --- | --- |
| 1 | 5,6-Dihydro-5-azacytidine | C8H14N4O5 | pos | 269.0874 | 4.3388 | 2.6048 | 0.01941 | up |
| 2 | Triisopropanolamine | C9H21NO3 | pos | 192.1592 | 3.6302 | 0.6727 | 0.01602 | down |
| 3 | Glycyl-Cysteine | C5H10N2O3S | pos | 217.0056 | 3.3376 | 0.7718 | 0.001138 | down |
| 4 | 2-(2-Thienyl)furan | C8H6OS | pos | 192.0475 | 3.3301 | 1.3495 | 0.000301 | up |
| 5 | QUISQUALIC ACID | C5H7N3O5 | pos | 231.072 | 3.1801 | 1.3717 | 0.006178 | up |
| 6 | Lignans | C22H22O8 | pos | 432.1691 | 3.1765 | 1.3534 | 0.001449 | up |
| 7 | Carbamazepine | C15H12N2O | pos | 269.1279 | 3.1076 | 1.3095 | 0.01029 | up |
| 8 | 4-Acetamido-2-aminobutanoic acid | C6H12N2O3 | pos | 143.0813 | 3.0659 | 0.8182 | 0.001468 | down |
| 9 | S-(2-Carboxyethyl)-L-cysteine | C6H11NO4S | pos | 176.0374 | 2.8857 | 1.2076 | 0.000399 | up |
| 10 | Zanamivir | C12H20N4O7 | pos | 355.1257 | 2.7477 | 1.2475 | 0.03546 | up |
| 11 | Glutathione, oxidized | C20H32N6O12S2 | pos | 613.158 | 2.7233 | 1.1739 | 0.008581 | up |
| 12 | Estrone | C18H22O2 | pos | 315.133 | 2.6872 | 1.2595 | 0.008668 | up |
| 13 | (2R,2'S)-Isobuteine | C7H13NO4S | pos | 271.0741 | 2.6578 | 1.2915 | 0.04935 | up |
| 14 | 5-Nitro-2-(3-phenylpropylamino)benzoic acid | C16H16N2O4 | pos | 301.1176 | 2.6546 | 1.2255 | 0.02793 | up |
| 15 | Phenethylamine glucuronide | C14H19NO6 | pos | 361.1385 | 2.4894 | 1.1677 | 0.005778 | up |
| 16 | (12E)-10-Hydroxytetradec-12-enoylcarnitine | C21H39NO5 | pos | 386.2893 | 2.4882 | 0.8817 | 0.004796 | down |
| 17 | 3,7,8,15-Scirpenetetrol | C15H22O6 | pos | 316.1748 | 2.3577 | 0.8933 | 0.000811 | down |
| 18 | Salsoline-1-carboxylate | C12H15NO4 | pos | 202.0858 | 2.341 | 0.8886 | 6.27E-05 | down |
| 19 | PE(22:0/14:1(9Z)) | C41H80NO8P | pos | 768.5535 | 2.3166 | 0.9174 | 0.000111 | down |
| 20 | (10Z)-12-Hydroxyhexadecenoylcarnitine | C23H43NO5 | pos | 396.31 | 2.3092 | 0.9159 | 0.001544 | down |
| 21 | (Z)-Methyl 3-(methylsulfinyl)-1-propenyl disulfide | C5H10OS3 | pos | 215.0226 | 2.294 | 0.8878 | 0.001193 | down |
| 22 | PE(22:2(13Z,16Z)/14:1(9Z)) | C41H76NO8P | pos | 764.5215 | 2.237 | 0.9287 | 0.00047 | down |
| 23 | Oxacillin | C19H19N3O5S | pos | 419.1374 | 2.2135 | 1.197 | 0.03944 | up |
| 24 | 3-[4-(3-Trifluoromethyl-phenyl)-piperazin-1-yl]-dihydrofuran-2-one | C15H17F3N2O2 | pos | 315.1331 | 2.1808 | 1.1361 | 0.02553 | up |
| 25 | GPEtn(16:1/22:5) | C43H74NO8P | pos | 764.5213 | 2.0995 | 0.9312 | 0.001458 | down |
| 26 | L-Carnitine | C7H15NO3 | pos | 162.1122 | 2.0383 | 1.0512 | 6.67E-06 | up |
| 27 | PC(14:0/18:1(11Z)) | C40H78NO8P | pos | 732.5523 | 2.0183 | 0.9233 | 0.02441 | down |
| 28 | LysoPC(18:2(9Z,12Z)/0:0) | C26H50NO7P | pos | 564.3051 | 2.0084 | 1.0732 | 0.001883 | up |
| 29 | (+)-Praeruptorin A | C21H22O7 | pos | 404.1742 | 1.9956 | 1.0762 | 0.007485 | up |
| 30 | Marbofloxacin | C17H19FN4O4 | pos | 404.1742 | 1.973 | 1.0796 | 0.008266 | up |
| 31 | (2S)-2-Hydroxyhexadecanoylcarnitine | C23H45NO5 | pos | 398.3257 | 1.9589 | 0.9417 | 0.002224 | down |
| 32 | SM(d18:1/16:0) | C39H79N2O6P | pos | 725.5553 | 1.934 | 0.9486 | 0.000645 | down |
| 33 | L-Norleucine | C6H13NO2 | pos | 173.1283 | 1.9129 | 0.9322 | 0.001586 | down |
| 34 | Biliverdin | C33H34N4O6 | pos | 583.2538 | 1.9022 | 1.0979 | 0.03861 | up |
| 35 | SM(d18:0/16:1(9Z)) | C39H79N2O6P | pos | 725.5558 | 1.894 | 0.9326 | 0.008697 | down |
| 36 | Hydroxytetradecadienyl-l-carnitine | C21H39NO4 | pos | 370.2944 | 1.8287 | 0.9461 | 0.004988 | down |
| 37 | 3-Hydroxyoctadecanoylcarnitine | C25H49NO5 | pos | 426.357 | 1.795 | 0.9568 | 0.00075 | down |
| 38 | Tetradecanoylcarnitine | C21H41NO4 | pos | 372.3101 | 1.7734 | 0.9507 | 0.004089 | down |
| 39 | Ser Ile Ala Asp | C16H28N4O8 | pos | 405.1971 | 1.7702 | 0.9272 | 0.03309 | down |
| 40 | Hydroxyoctadecenoylcarnitine | C25H47NO5 | pos | 424.3412 | 1.7692 | 0.9572 | 0.000881 | down |
| 41 | Anabasine | C10H14N2 | pos | 342.2631 | 1.757 | 0.9359 | 0.01587 | down |
| 42 | 3-methylheptanedioylcarnitine | C15H27NO6 | pos | 318.1904 | 1.7526 | 0.9385 | 0.008882 | down |
| 43 | PE-NMe2(22:5(7Z,10Z,13Z,16Z,19Z)/18:1(11Z)) | C47H82NO8P | pos | 820.5837 | 1.748 | 0.9418 | 0.02742 | down |
| 44 | PE(18:1(11Z)/18:1(9Z)) | C41H78NO8P | pos | 744.5549 | 1.7113 | 0.9605 | 0.000458 | down |
| 45 | 3-Hydroxy-6-octenoylcarnitine | C15H27NO5 | pos | 302.1956 | 1.6928 | 0.9381 | 0.01086 | down |
| 46 | Tyrosine methylester | C10H13NO3 | pos | 218.0799 | 1.6482 | 1.076 | 0.01821 | up |
| 47 | GPEtn(14:0/22:2) | C41H78NO8P | pos | 744.5546 | 1.6401 | 0.9611 | 0.001092 | down |
| 48 | Caryophyllen-beta | C13H23NO6 | pos | 290.159 | 1.6201 | 0.9394 | 0.02394 | down |
| 49 | Lauroylcarnitine | C19H37NO4 | pos | 344.2788 | 1.6137 | 0.9478 | 0.0209 | down |
| 50 | PC(16:0/16:1(9Z)) | C40H78NO8P | pos | 732.5522 | 1.5769 | 0.9611 | 0.004757 | down |
| 51 | Octanoylcarnitine | C15H29NO4 | pos | 310.2005 | 1.5665 | 0.9526 | 0.01264 | down |
| 52 | Dihydroorotic Acid | C5H6N2O4 | pos | 176.0655 | 1.4851 | 0.9596 | 0.005004 | down |
| 53 | LysoPC(20:4(5Z,8Z,11Z,14Z)/0:0) | C28H50NO7P | pos | 566.3207 | 1.4725 | 1.0408 | 0.01381 | up |
| 54 | Succinyladenosine | C14H17N5O8 | pos | 384.1141 | 1.4679 | 1.058 | 0.02354 | up |
| 55 | Propionylcarnitine | C10H19NO4 | pos | 218.1383 | 1.4215 | 1.0377 | 0.008715 | up |
| 56 | LysoPC(0:0/18:2(9Z,12Z)) | C26H50NO7P | pos | 542.3224 | 1.374 | 1.0254 | 0.001385 | up |
| 57 | 3-Succinoylpyridine | C9H9NO3 | pos | 212.0913 | 1.3415 | 1.0434 | 0.001121 | up |
| 58 | Monopalmitin | C19H38O4 | pos | 313.273 | 1.3104 | 0.9684 | 0.004748 | down |
| 59 | Serotonin | C10H12N2O | pos | 218.1286 | 1.3033 | 0.9534 | 0.03587 | down |
| 60 | PC(16:0/20:0) | C44H88NO8P | pos | 834.5987 | 1.2965 | 0.9794 | 0.000977 | down |
| 61 | Adrenochrome | C9H9NO3 | pos | 212.0914 | 1.2643 | 1.0413 | 0.004536 | up |
| 62 | Norleucine | C6H13NO2 | pos | 132.1018 | 1.2546 | 0.9737 | 0.01331 | down |
| 63 | Porphobilinogen | C10H14N2O4 | pos | 191.0812 | 1.2518 | 1.0392 | 0.01422 | up |
| 64 | PC(20:3(5Z,8Z,11Z)/22:6(4Z,7Z,10Z,13Z,16Z,19Z)) | C50H82NO8P | pos | 856.5811 | 1.2427 | 0.9778 | 0.002291 | down |
| 65 | 24-Oxo-1alpha,25-dihydroxyvitamin D3 | C27H42O4 | pos | 448.3413 | 1.2339 | 0.9658 | 0.04924 | down |
| 66 | Cysteinyl-Serine | C6H12N2O4S | pos | 247.016 | 1.2338 | 1.0328 | 0.01522 | up |
| 67 | Piperidine | C5H11N | pos | 86.09679 | 1.2325 | 0.9734 | 0.01003 | down |
| 68 | GPCho(20:3/20:3) | C48H84NO8P | pos | 856.5806 | 1.2152 | 0.9721 | 0.0237 | down |
| 69 | PC(16:0/22:6(4Z,7Z,10Z,13Z,16Z,19Z)) | C46H80NO8P | pos | 806.5678 | 1.213 | 0.9791 | 0.04476 | down |
| 70 | Pyridoxal | C8H9NO3 | pos | 168.0654 | 1.2083 | 1.0367 | 0.02171 | up |
| 71 | (1(10)E,4a,5E)-1(10),5-Germacradiene-12-acetoxy-4,11-diol | C17H28O4 | pos | 314.2318 | 1.2057 | 0.9678 | 0.04032 | down |
| 72 | O-Acetylserine | C5H9NO4 | pos | 112.0394 | 1.203 | 0.9679 | 0.001561 | down |
| 73 | L-Isoleucine | C6H13NO2 | pos | 132.1017 | 1.1825 | 0.9764 | 0.01726 | down |
| 74 | LysoPC(20:4(8Z,11Z,14Z,17Z)/0:0) | C28H50NO7P | pos | 544.3386 | 1.1819 | 1.0191 | 0.01165 | up |
| 75 | 3-Aminopicolinaldehyde | C6H6N2O | pos | 123.0553 | 1.1777 | 1.0306 | 0.03882 | up |
| 76 | Pipecolic Acid | C6H11NO2 | pos | 130.0862 | 1.1604 | 0.9726 | 0.02211 | down |
| 77 | Niacinamide | C6H6N2O | pos | 123.0553 | 1.1589 | 1.0284 | 0.02728 | up |
| 78 | PC(17:0/0:0) | C25H52NO7P | pos | 510.3547 | 1.1477 | 1.0243 | 0.03636 | up |
| 79 | 2-Amino-2-methyl-1-propanol | C4H11NO | pos | 72.08125 | 1.1302 | 0.9727 | 0.01588 | down |
| 80 | 4-Quinolinecarboxylic Acid | C10H7NO2 | pos | 174.0547 | 1.1092 | 1.0391 | 0.02413 | up |
| 81 | LysoPC(22:6(4Z,7Z,10Z,13Z,16Z,19Z)/0:0) | C30H50NO7P | pos | 568.3387 | 1.0757 | 1.0174 | 0.0231 | up |
| 82 | 1,2-Dipalmitoylphosphatidylcholine | C40H80NO8P | pos | 756.5523 | 1.0671 | 0.9834 | 0.02323 | down |
| 83 | Palmitoylcarnitine | C23H45NO4 | pos | 400.3414 | 1.0656 | 0.9797 | 0.03232 | down |
| 84 | [3-[2-Aminoethoxy(hydroxy)phosphoryl]oxy-2-hydroxypropyl] hexadecanoate | C21H44NO7P | pos | 454.2919 | 1.0474 | 0.9824 | 0.008878 | down |
| 85 | Isoetharine | C13H21NO3 | pos | 542.3209 | 1.0152 | 1.0198 | 0.04008 | up |
| 86 | LysoPC(18:3(6Z,9Z,12Z)/0:0) | C26H48NO7P | pos | 518.322 | 1.0084 | 1.0134 | 0.002359 | up |
| 87 | 3-Methyldioxyindole | C9H9NO2 | neg | 208.061 | 3.809 | 2.8475 | 0.02191 | up |
| 88 | N-Palmitoyl Isoleucine | C22H43NO3 | neg | 368.317 | 3.7833 | 0.6841 | 4.05E-05 | down |
| 89 | 18-HEPE | C20H30O3 | neg | 363.218 | 3.7157 | 0.6962 | 0.000359 | down |
| 90 | 20-Cooh ltb4 | C21H32O6 | neg | 361.2022 | 3.4416 | 0.737 | 0.00135 | down |
| 91 | Inositol cyclic phosphate | C6H11O8P | neg | 287.0166 | 3.4272 | 1.3945 | 0.00075 | up |
| 92 | Cannabigerolate | C22H32O4 | neg | 341.212 | 2.9408 | 0.8041 | 0.003591 | down |
| 93 | 3-[5-[(Dipropylamino)methyl]-1,2,4-oxadiazol-3-yl]-8-fluoro-5-methyl-4H-imidazo[1,5-a][1,4]benzodiazepin-6-one | C21H25FN6O2 | neg | 449.1503 | 2.8404 | 0.7654 | 0.006539 | down |
| 94 | Isohumulinone A | C21H30O6 | neg | 359.1898 | 2.7767 | 0.7951 | 0.000528 | down |
| 95 | 6-Hydroxy-4-methoxy-3-(3-methyl-2-butenyl)-2-(2-phenylethenyl)benzoic acid | C21H22O4 | neg | 359.125 | 2.7362 | 1.244 | 0.003121 | up |
| 96 | Anisatin | C15H20O8 | neg | 309.0958 | 2.6619 | 0.8161 | 0.001845 | down |
| 97 | Oxidized Glutathione | C20H32N6O12S2 | neg | 611.1451 | 2.6525 | 1.1928 | 0.0117 | up |
| 98 | Phosphate | H3O4P | neg | 96.96864 | 2.5549 | 1.2165 | 0.03039 | up |
| 99 | Cromakalim | C16H18N2O3 | neg | 267.1141 | 2.544 | 1.144 | 0.001328 | up |
| 100 | PE-NMe(15:0/22:6(4Z,7Z,10Z,13Z,16Z,19Z)) | C43H74NO8P | neg | 762.5081 | 2.3979 | 0.898 | 0.000469 | down |
| 101 | Benazeprilat | C22H24N2O5 | neg | 433.114 | 2.3389 | 0.8462 | 0.04395 | down |
| 102 | 2-Hydroxy-6-pentadecylbenzoic acid | C22H36O3 | neg | 347.2593 | 2.2876 | 0.9002 | 0.000543 | down |
| 103 | 4-(2,6,6-Trimethyl-1-cyclohexenyl)-2-butanol | C13H24O | neg | 241.1808 | 2.2796 | 0.8989 | 0.002639 | down |
| 104 | Ancymidol | C15H16N2O2 | neg | 255.1139 | 2.2717 | 1.2262 | 0.03113 | up |
| 105 | N-Stearoyl Histidine | C24H43N3O3 | neg | 466.3306 | 2.2014 | 0.8916 | 0.000571 | down |
| 106 | 16-a-Hydroxypregnenolone | C21H32O3 | neg | 377.2335 | 2.1882 | 0.8943 | 0.004103 | down |
| 107 | 6-Hydroxyhexanoic Acid | C6H12O3 | neg | 131.0705 | 2.1092 | 0.9254 | 0.003174 | down |
| 108 | 3-[(3-(2-Carboxyethyl)-4-methylpyrrol-2-YL)methylene]-2-indolinone | C17H16N2O3 | neg | 341.1143 | 2.0856 | 1.1889 | 0.0376 | up |
| 109 | 12,13-DHOME | C18H34O4 | neg | 295.2278 | 2.0838 | 0.9163 | 0.000667 | down |
| 110 | 4-(2,6,6-Trimethyl-1-cyclohexen-1-yl)-2-butanone | C13H22O | neg | 239.1651 | 2.0832 | 0.9185 | 0.00321 | down |
| 111 | Hymenoxon | C15H22O5 | neg | 281.1372 | 2.0777 | 0.8813 | 0.005838 | down |
| 112 | (1R,2R)-1,2,7,7-Tetramethylbicyclo[2.2.1]heptan-2-ol | C11H20O | neg | 213.1492 | 2.0656 | 0.9091 | 0.004405 | down |
| 113 | LysoPC(20:3(5Z,8Z,11Z)/0:0) | C28H52NO7P | neg | 590.3463 | 2.0656 | 1.0835 | 0.000696 | up |
| 114 | Hydroxynalidixic acid | C12H12N2O4 | neg | 293.078 | 2.0226 | 0.9089 | 0.007374 | down |
| 115 | 3-Hydroxybutanoic Acid | C4H8O3 | neg | 103.0391 | 2.018 | 0.9392 | 0.000346 | down |
| 116 | Phenylglucuronide | C12H14O7 | neg | 269.0667 | 1.9901 | 1.1097 | 0.009758 | up |
| 117 | PE(18:1(11Z)/18:0) | C41H80NO8P | neg | 766.5403 | 1.9815 | 0.9386 | 0.000149 | down |
| 118 | 10-HDoHE | C22H32O3 | neg | 343.2278 | 1.8998 | 0.9422 | 0.003189 | down |
| 119 | Nafazatrom | C16H16N2O2 | neg | 313.1196 | 1.8863 | 1.0903 | 0.004469 | up |
| 120 | 9(S)-HOTrE | C18H30O3 | neg | 293.2124 | 1.8644 | 0.925 | 0.000748 | down |
| 121 | Thymidine | C10H14N2O5 | neg | 287.0885 | 1.8634 | 0.9241 | 0.00156 | down |
| 122 | Indolelactic acid | C11H11NO3 | neg | 204.0662 | 1.8542 | 0.9355 | 0.005359 | down |
| 123 | Ginkgoic acid | C22H34O3 | neg | 345.2435 | 1.8492 | 0.9407 | 0.001462 | down |
| 124 | Mevastatin | C23H34O5 | neg | 411.2155 | 1.8315 | 0.93 | 0.006233 | down |
| 125 | 4-Hydroxyphenylpyruvic Acid | C9H8O4 | neg | 179.0344 | 1.8127 | 1.1319 | 0.02167 | up |
| 126 | LysoPA(16:0/0:0) | C19H39O7P | neg | 391.2256 | 1.803 | 1.0988 | 0.02423 | up |
| 127 | Deoxyuridine | C9H12N2O5 | neg | 227.067 | 1.7846 | 0.9328 | 0.000656 | down |
| 128 | PE(P-18:0/22:6(4Z,7Z,10Z,13Z,16Z,19Z)) | C45H78NO7P | neg | 774.5454 | 1.7373 | 0.9513 | 0.000143 | down |
| 129 | 3-Hydroxyvaleric Acid | C5H10O3 | neg | 117.0548 | 1.6849 | 0.9588 | 0.000621 | down |
| 130 | N-Acetyl-L-methionine | C7H13NO3S | neg | 190.0539 | 1.6559 | 1.0666 | 0.002311 | up |
| 131 | Edetic Acid | C10H16N2O8 | neg | 273.0728 | 1.6391 | 0.9364 | 0.006324 | down |
| 132 | PE(20:4(8Z,11Z,14Z,17Z)/18:1(11Z)) | C43H76NO8P | neg | 764.5238 | 1.6259 | 0.9427 | 0.005383 | down |
| 133 | Normethandrone | C19H28O2 | neg | 333.2072 | 1.5762 | 0.9473 | 0.003002 | down |
| 134 | LysoPE(P-18:0/0:0) | C23H48NO6P | neg | 464.3148 | 1.5715 | 0.9554 | 0.000276 | down |
| 135 | Lubiminol | C15H26O3 | neg | 253.1809 | 1.5474 | 1.0573 | 0.02654 | up |
| 136 | Loliolide | C11H16O3 | neg | 241.108 | 1.5429 | 0.9529 | 0.001472 | down |
| 137 | D-Galactose | C6H12O6 | neg | 215.0324 | 1.5384 | 1.0342 | 0.000886 | up |
| 138 | Hydroxypropionic Acid | C3H6O3 | neg | 225.0613 | 1.5216 | 1.0366 | 0.00094 | up |
| 139 | 4-Ethylphenylsulfate | C8H10O4S | neg | 201.0222 | 1.5178 | 0.9468 | 0.04638 | down |
| 140 | 12-KETE | C20H30O3 | neg | 317.2122 | 1.4746 | 0.9598 | 0.009611 | down |
| 141 | 20-Hydroxyeicosatrieneoic acid | C20H34O3 | neg | 321.243 | 1.4486 | 0.9605 | 0.002845 | down |
| 142 | PC(18:0/22:6(4Z,7Z,10Z,13Z,16Z,19Z)) | C48H84NO8P | neg | 878.5933 | 1.4472 | 0.9578 | 0.008205 | down |
| 143 | Norfuraneol | C5H6O3 | neg | 113.0235 | 1.4341 | 1.0403 | 0.001258 | up |
| 144 | Prostaglandin A1 | C20H32O4 | neg | 335.2229 | 1.3824 | 0.9659 | 0.003186 | down |
| 145 | PE-NMe2(16:0/18:2(9Z,12Z)) | C41H78NO8P | neg | 742.5405 | 1.3582 | 0.9641 | 0.004065 | down |
| 146 | Succinic Acid | C4H6O4 | neg | 117.0184 | 1.3518 | 1.0443 | 0.02925 | up |
| 147 | LysoPC(20:5(5Z,8Z,11Z,14Z,17Z)/0:0) | C28H48NO7P | neg | 586.3158 | 1.3426 | 1.0423 | 0.009321 | up |
| 148 | Strophanthidin | C23H32O6 | neg | 385.1999 | 1.3371 | 0.954 | 0.03097 | down |
| 149 | Hexadecanedioic acid | C16H30O4 | neg | 285.2072 | 1.3246 | 0.9586 | 0.005721 | down |
| 150 | PE(16:0/0:0) | C21H44NO7P | neg | 452.2785 | 1.3042 | 0.9761 | 0.000148 | down |
| 151 | Daucol | C15H26O2 | neg | 283.1915 | 1.2822 | 0.9583 | 0.008948 | down |
| 152 | 3-Phenyllactic Acid | C9H10O3 | neg | 165.055 | 1.271 | 0.9597 | 0.01821 | down |
| 153 | L-Palmitoylcarnitine | C23H45NO4 | neg | 436.2835 | 1.2108 | 0.9739 | 0.000974 | down |
| 154 | PS(24:0/15:0) | C45H88NO10P | neg | 854.5932 | 1.207 | 0.9682 | 0.02945 | down |
| 155 | (E,2S,3R)-5-[3-Hydroxy-2-(hydroxymethyl)phenyl]pent-4-ene-2,3-Diol | C12H16O4 | neg | 223.0974 | 1.1981 | 0.9683 | 0.001882 | down |
| 156 | Threonic acid | C4H8O5 | neg | 157.011 | 1.1726 | 1.0244 | 4.77E-05 | up |
| 157 | 1-(11Z-eicosenoyl)-glycero-3-phosphate | C23H45O7P | neg | 509.2889 | 1.1528 | 0.9668 | 0.008701 | down |
| 158 | PE-NMe(18:1(11Z)/18:2(9Z,12Z)) | C42H78NO8P | neg | 800.5461 | 1.0982 | 0.9713 | 0.03262 | down |
| 159 | 16-Hydroxyhexadecanoic acid | C16H32O3 | neg | 271.228 | 1.0928 | 0.9725 | 0.01391 | down |
| 160 | C75 | C14H22O4 | neg | 253.1445 | 1.0781 | 0.9747 | 0.003108 | down |
| 161 | 2-Hydroxystearic acid | C18H36O3 | neg | 299.2592 | 1.0666 | 0.9659 | 0.04122 | down |
| 162 | 12(R)-HETE | C20H32O3 | neg | 319.2279 | 1.0527 | 0.979 | 0.04557 | down |
| 163 | PE(22:6/0:0) | C27H44NO7P | neg | 524.2785 | 1.0284 | 0.982 | 0.02381 | down |
| 164 | Methaqualone | C16H14N2O | neg | 295.1089 | 1.0277 | 1.0291 | 0.0199 | up |
| 165 | Gamma-Glutamylisoleucine | C11H20N2O5 | neg | 259.1299 | 1.0215 | 0.9716 | 0.04999 | down |
| 166 | 12-Hydroxyheptadecanoylcarnitine | C24H47NO5 | neg | 466.294 | 1.0179 | 0.977 | 0.01442 | down |
| 167 | N-Formyl-L-Methionine | C6H11NO3S | neg | 176.038 | 1.0162 | 1.0271 | 0.02774 | up |
| 159 | 5,6-Dihydro-5-azacytidine | C8H14N4O5 | pos | 269.0874 | 4.3388 | 2.6048 | 0.01941 | up |
| 160 | Triisopropanolamine | C9H21NO3 | pos | 192.1592 | 3.6302 | 0.6727 | 0.01602 | down |
| 161 | Glycyl-Cysteine | C5H10N2O3S | pos | 217.0056 | 3.3376 | 0.7718 | 0.001138 | down |
| 162 | 2-(2-Thienyl)furan | C8H6OS | pos | 192.0475 | 3.3301 | 1.3495 | 0.000301 | up |
| 163 | QUISQUALIC ACID | C5H7N3O5 | pos | 231.072 | 3.1801 | 1.3717 | 0.006178 | up |
| 164 | Lignans | C22H22O8 | pos | 432.1691 | 3.1765 | 1.3534 | 0.001449 | up |
| 165 | Carbamazepine | C15H12N2O | pos | 269.1279 | 3.1076 | 1.3095 | 0.01029 | up |
| 166 | 4-Acetamido-2-aminobutanoic acid | C6H12N2O3 | pos | 143.0813 | 3.0659 | 0.8182 | 0.001468 | down |
| 167 | S-(2-Carboxyethyl)-L-cysteine | C6H11NO4S | pos | 176.0374 | 2.8857 | 1.2076 | 0.000399 | up |

**Table S3** Recovery of differential metabolites after allicin intervention in three groups.

| No. | Metabolite | Formula | Mode | M/Z | Regulate |
| --- | --- | --- | --- | --- | --- |
| 1 | Salsoline-1-carboxylate | C12H15NO4 | pos | 202.0858 | up |
| 2 | Monopalmitin | C19H38O4 | pos | 313.273 | up |
| 3 | Ser Ile Ala Asp | C16H28N4O8 | pos | 405.1971 | up |
| 4 | O-Acetylserine | C5H9NO4 | pos | 112.0394 | up |
| 5 | 5,6-Dihydro-5-azacytidine | C8H14N4O5 | pos | 269.0874 | down |
| 6 | L-Carnitine | C7H15NO3 | pos | 162.1122 | down |
| 7 | 4-Acetamido-2-aminobutanoic acid | C6H12N2O3 | pos | 143.0813 | up |
| 8 | Triisopropanolamine | C9H21NO3 | pos | 192.1592 | up |
| 9 | PE(P-18:0/22:6(4Z,7Z,10Z,13Z,16Z,19Z)) | C45H78NO7P | neg | 774.5454 | up |
| 10 | LysoPE(P-18:0/0:0) | C23H48NO6P | neg | 464.3148 | up |
| 11 | 2-Hydroxystearic acid | C18H36O3 | neg | 299.2592 | up |
| 12 | N-Palmitoyl Isoleucine | C22H43NO3 | neg | 368.317 | up |
| 13 | 1-(11Z-eicosenoyl)-glycero-3-phosphate | C23H45O7P | neg | 509.2889 | up |
| 14 | 12-Hydroxyheptadecanoylcarnitine | C24H47NO5 | neg | 466.294 | up |
| 15 | L-Palmitoylcarnitine | C23H45NO4 | neg | 436.2835 | up |
| 16 | PE(22:6/0:0) | C27H44NO7P | neg | 524.2785 | up |
| 17 | Daucol | C15H26O2 | neg | 283.1915 | up |
| 18 | 16-a-Hydroxypregnenolone | C21H32O3 | neg | 377.2335 | up |
| 19 | Deoxyuridine | C9H12N2O5 | neg | 227.067 | up |
| 20 | Edetic Acid | C10H16N2O8 | neg | 273.0728 | up |
| 21 | 20-Hydroxyeicosatrieneoic acid | C20H34O3 | neg | 321.243 | up |
| 22 | Phenylglucuronide | C12H14O7 | neg | 269.0667 | down |
| 23 | 4-Ethylphenylsulfate | C8H10O4S | neg | 201.0222 | up |
| 24 | 3-[5-[(Dipropylamino)methyl]-1,2,4-oxadiazol-3-yl]-8-fluoro-5-methyl-4H-imidazo[1,5-a][1,4]benzodiazepin-6-one | C21H25FN6O2 | neg | 449.1503 | up |
| 25 | PE-NMe(18:1(11Z)/18:2(9Z,12Z)) | C42H78NO8P | neg | 800.5461 | up |
| 26 | 12,13-DHOME | C18H34O4 | neg | 295.2278 | up |
| 27 | PE(16:0/0:0) | C21H44NO7P | neg | 452.2785 | up |
| 28 | 16-Hydroxyhexadecanoic acid | C16H32O3 | neg | 271.228 | up |
| 29 | N-Stearoyl Histidine | C24H43N3O3 | neg | 466.3306 | up |
